# Supplementary material
Source: PubMed Central journal article supplement (PMC4530038)
Supplement: NIHMS702145-supplement-1.pdf [file NIHMS702145-supplement-1.pdf]

## Supplemental Figures for

### “Peripherally induced tolerance depends on pTreg cells that require Hopx to inhibit intrinsic IL-2 expression”

Andrew Jones<sup>\*</sup>, Adeleye Opejin<sup>\*</sup>, Jacob G. Henderson<sup>\*</sup>, Cindy Gross<sup>\*</sup>, Rajan Jain<sup>†</sup>, Jonathan A. Epstein<sup>†</sup>, Richard A. Flavell<sup>‡</sup> and Daniel Hawiger<sup>\*</sup>

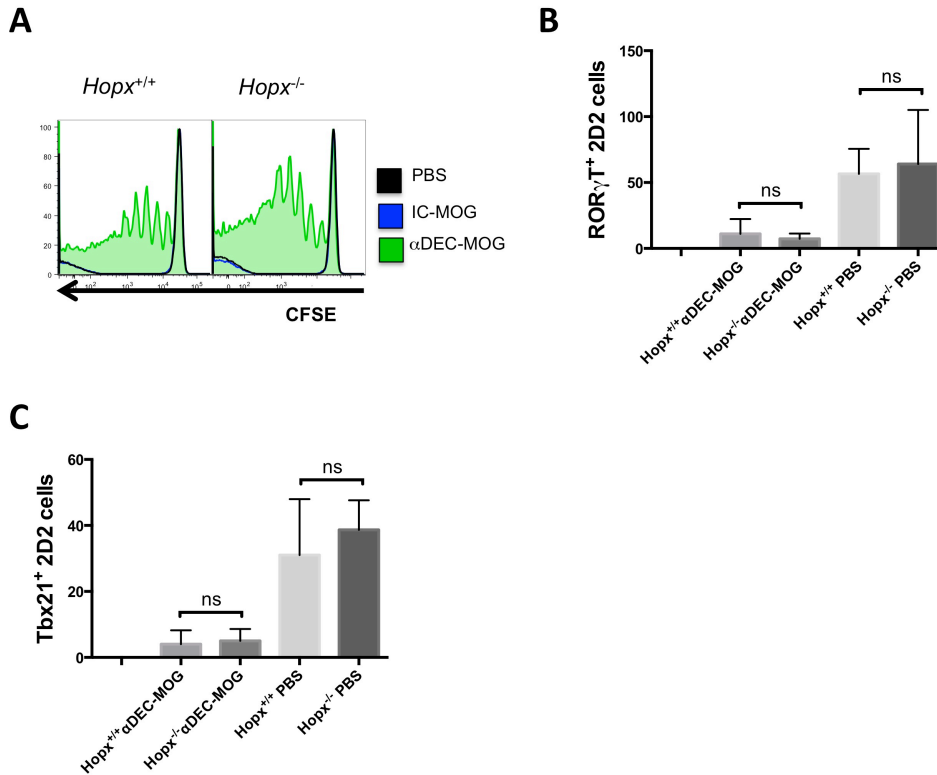

**Supplemental Figure 1. (A)** Histograms show CFSE dye dilution of gated populations of CD4<sup>+</sup> CD45.1<sup>+</sup> 2D2 TCR tg T cells adoptively transferred into Hopx<sup>+/+</sup> and Hopx<sup>-/-</sup> mice that were treated with either (■) αDEC-MOG, (■) IC-MOG or (■) PBS as indicated. The results represent one of two similar experiments. **(B-C)** Hopx<sup>+/+</sup> or Hopx<sup>-/-</sup> CD4<sup>+</sup> Foxp3<sup>neg</sup> CD25<sup>neg</sup> 2D2 TCR tg T cells were adoptively transferred into CD45.1<sup>+</sup> recipient mice that were then treated with αDEC-MOG. 8 days later recipient mice were immunized with MOG/CFA and PTX. Graphs show mean number of transferred cells that stained positive for (B) RORγT or (C) Tbx21 7 days after MOG/CFA and PTX treatment +/- SD.

Results shown in (A-C) are from lymph nodes and similar results were obtained from spleens.

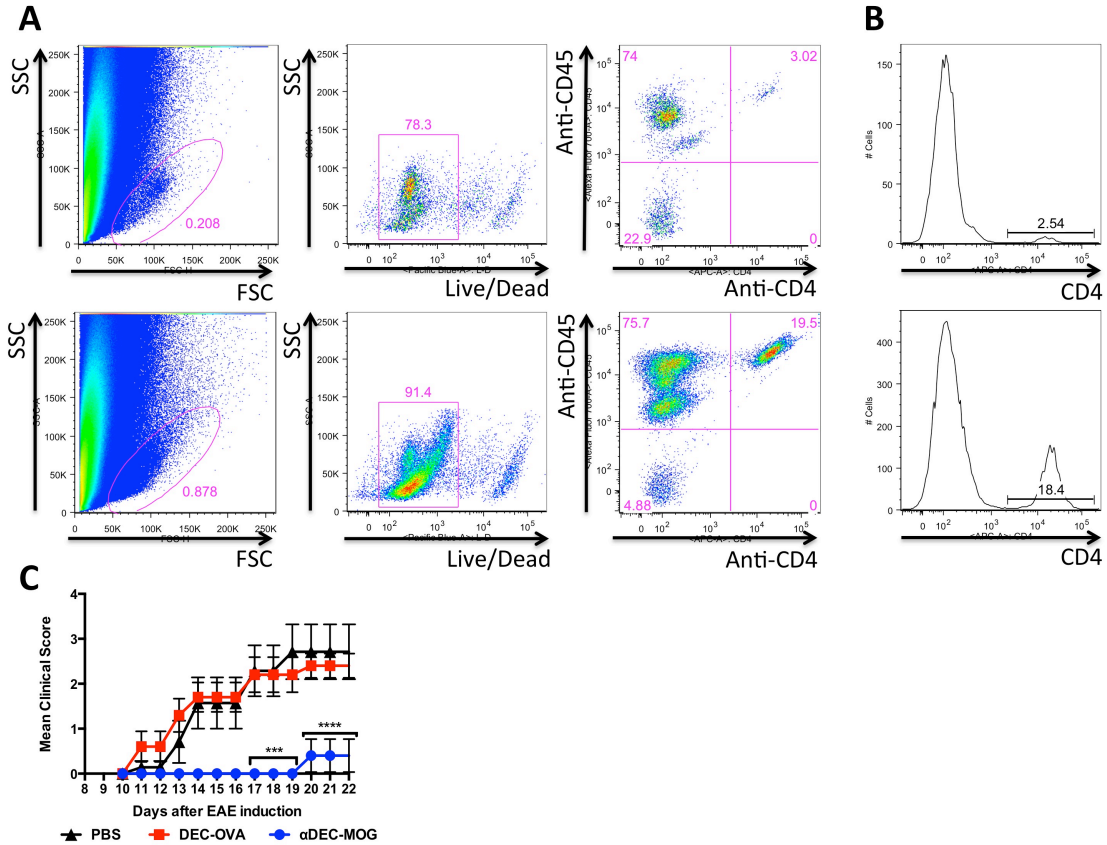

## Supplemental Figure 2.

**(A)** Gating strategy starting with an initial “lymphoid gate” for spinal cords analyzed by FACS from mice with an EAE score of 0 (top panels) or an EAE score of 3 (bottom panels). **(B)** FACS analysis of the same spinal cord samples of as in (A) and as employed in figures 1D, 1E, 3C, 3E and 5D, based on initial “lymphoid gate”. **(C)** Multiple groups of mice were treated with  $\alpha$ DEC-MOG,  $\alpha$ DEC-OVA or PBS 5 weeks before immunization with MOG<sub>35-55</sub> in CFA + *PT*. Graphs show mean disease scores (n=10 per group from 2 experiments). Results are mean +/- SEM, \*\*\* P< 0.001 and \*\*\*\* P< 0.0001 determined by two-way ANOVA.

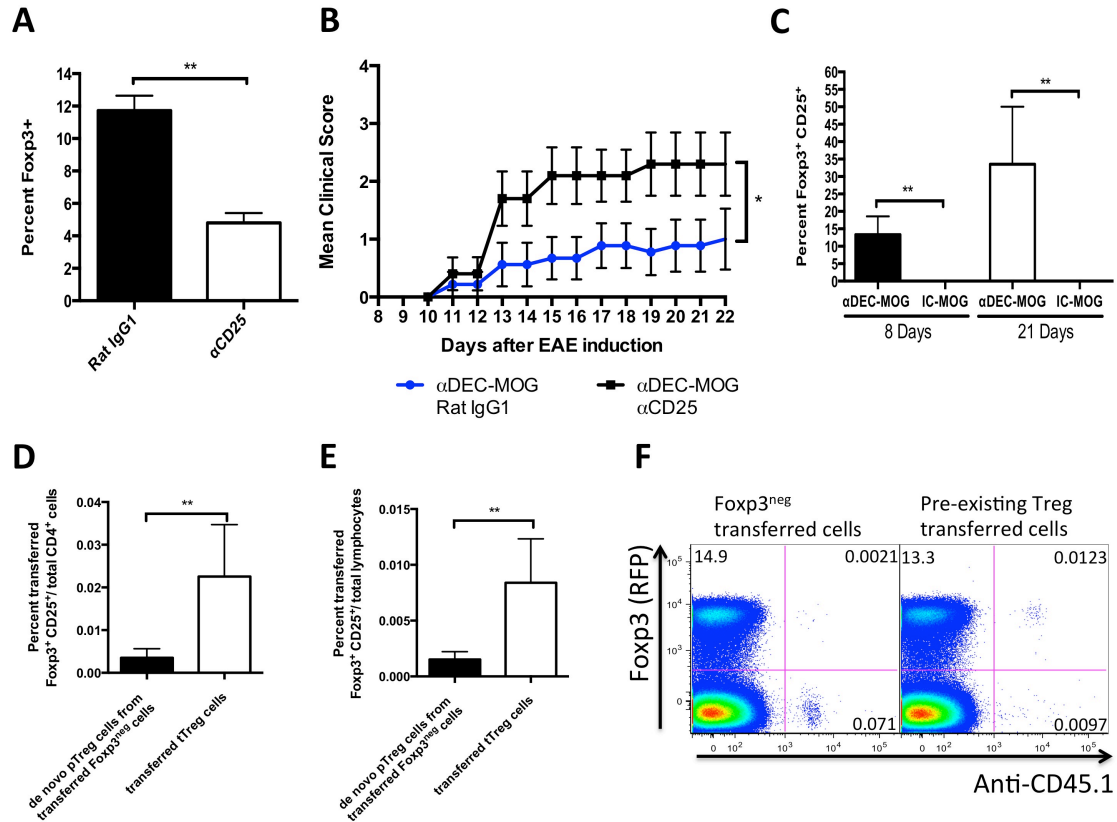

**Supplemental Figure 3.**

**(A)** Foxp3<sup>RFP</sup> mice were treated with either αCD25 or the same dose of Rat IgG1. 3 weeks after treatment lymph nodes were analyzed by FACS. Graphs show the percent of Foxp3<sup>+</sup> cells among CD4<sup>+</sup> cells (n=3-4 per group). Results show mean +/- SEM, \*\* P<0.01 determined by Students T test. Similar results were obtained from spleens. **(B)** Two groups of C57BL/6 mice were treated with αDEC-MOG. 3 weeks after treatment with αDEC-MOG, individual groups of mice were injected with either αCD25 or the same dose of Rat IgG1. After another 3 weeks EAE was induced. Graph shows mean disease scores (n=9-10 per group from 2 experiments). Results show mean +/- SEM, \* P<0.05 determined by two-way ANOVA. **(C)** GFP<sup>neg</sup>/RFP<sup>neg</sup>/CD25<sup>neg</sup> CD4<sup>+</sup> T cells were purified by sorting from 2D2 TCR tg Hopx<sup>Flag-viral2A-GFP</sup>/Foxp3<sup>RFP</sup> double-reporter mice and then adoptively transferred into CD45.1 recipient mice. Spleens from recipient mice were

analyzed at multiple days after treatment with  $\alpha$ DEC-MOG or IC-MOG as indicated. Graphs show the average percentage of transferred cells that were foxp3<sup>+</sup> CD25<sup>+</sup> +/- SD, \*\* P<0.01 determined by Students T test. **(D-F)** CD4<sup>+</sup> CD45.1<sup>+</sup> Foxp3<sup>neg</sup> or Foxp3<sup>+</sup> T cells were adoptively transferred into multiple CD45.2 recipient mice that were then treated with  $\alpha$ DEC-MOG. Lymph nodes from recipient mice were analyzed by FACS 6 weeks after treatment with  $\alpha$ DEC-MOG. **(D)** Graphs show the frequency of transferred cells that were Foxp3<sup>+</sup>CD25<sup>+</sup> among total CD4<sup>+</sup> cells. **(E)** Graphs show the frequency of transferred cells that were Foxp3<sup>+</sup> CD25<sup>+</sup> among total lymphocytes. **D** and **E** (n=3-7) +/- SD, \*\* P<0.01 determined by Students T test. **(F)** Representative plots show Foxp3 (RFP) expression (Y-axis) and staining intensity with anti-CD45.1 (X-axis) among CD4<sup>+</sup> cells. Similar results were obtained from spleens.

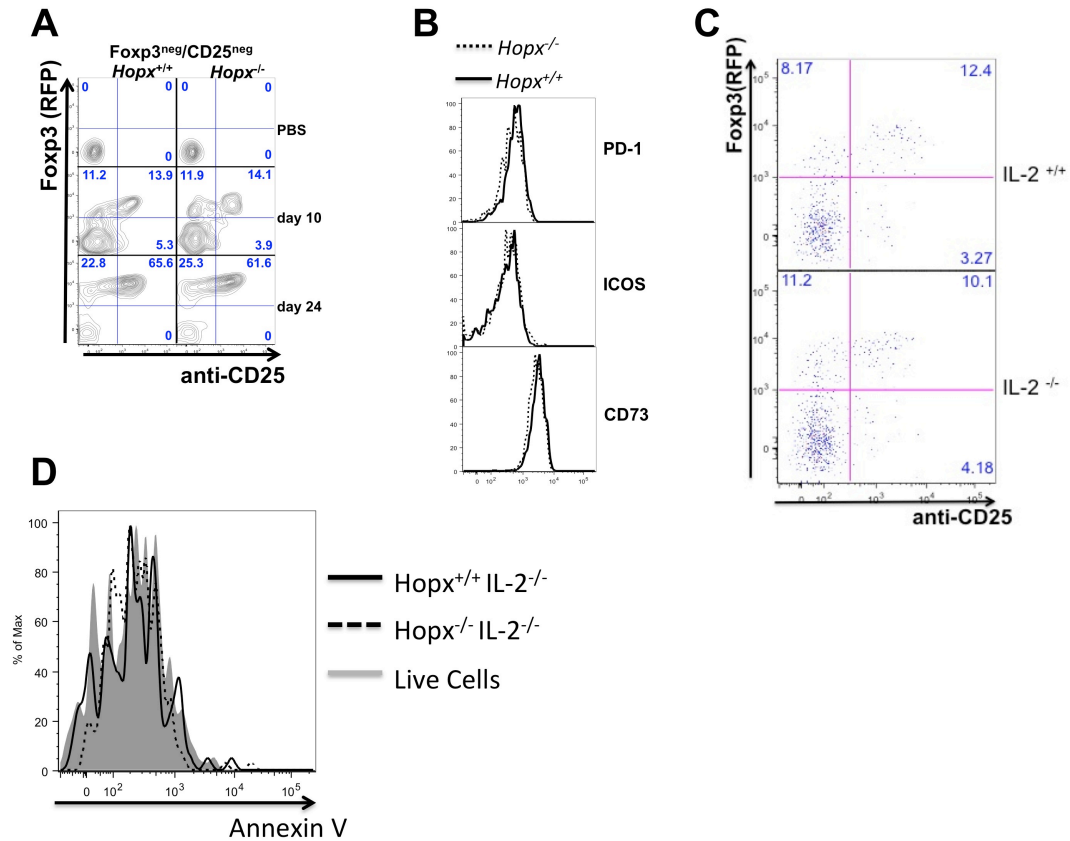

#### Supplemental Figure 4.

(A-B) Foxp3<sup>neg</sup> CD25<sup>neg</sup> CD4<sup>+</sup> T cells were purified by sorting from either Hopx<sup>+/+</sup> or Hopx<sup>-/-</sup> 2D2 TCR tg Foxp3<sup>RFP</sup> mice and then adoptively transferred into CD45.1<sup>+</sup> recipient mice that were then treated with  $\alpha$ DEC-MOG or PBS. (A) Plots show Foxp3 (RFP) expression (Y-axis) and staining intensity with anti-CD25 (X-axis) of gated populations of adoptively transferred cells from recipient mice 10 days or 24 days after  $\alpha$ DEC-MOG treatment or PBS treatment. The results represent one of three similar experiments. (B) Histograms show staining intensity with anti-PD-1, anti-ICOS and anti-CD73 of induced Hopx<sup>+/+</sup> or Hopx<sup>-/-</sup> Foxp3<sup>+</sup>/CD25<sup>+</sup> cells 24 days after  $\alpha$ DEC-MOG treatment. Results represent one of two similar experiments. (C) Foxp3<sup>neg</sup> CD25<sup>neg</sup> CD4<sup>+</sup> T cells were purified by sorting from either Hopx<sup>-/-</sup> IL-2<sup>+/+</sup> or Hopx<sup>-/-</sup> IL-2<sup>-/-</sup> 2D2 TCR tg Foxp3<sup>RFP</sup> mice and then adoptively transferred into CD45.1<sup>+</sup> recipient mice that were then treated with

$\alpha$ DEC-MOG. Plots show Foxp3 (RFP) expression (Y-axis) and staining intensity with anti-CD25 (X-axis) of gated populations of adoptively transferred cells from lymph nodes of recipient mice after treatment with  $\alpha$ DEC-MOG. Results represent one of two similar experiments. **(D)** Foxp3<sup>neg</sup> CD25<sup>neg</sup> CD4<sup>+</sup> T cells were purified by sorting from either *Hopx*<sup>+/+</sup> IL-2<sup>-/-</sup> or *Hopx*<sup>-/-</sup> IL-2<sup>-/-</sup> /2D2 TCR tg Foxp3<sup>RFP</sup> mice and then adoptively transferred into CD45.1<sup>+</sup> recipient mice that were then treated with  $\alpha$ DEC-MOG. After 9 days recipient mice were treated with MOG/CFA and PTX. Overlaid histograms show staining intensity with Annexin V in Foxp3<sup>+</sup>CD25<sup>+</sup> pTreg cells 3 days after MOG/CFA and PTX. Results represent one of two similar experiments. Results shown in (A-D) are from lymph nodes and similar results were obtained from spleens.
